# Supplementary material for: Synthesis and Evaluation of a Chitosan Oligosaccharide-Streptomycin Conjugate against Pseudomonas aeruginosa Biofilms
Source: MDPI journal article supplement (doi:10.3390/md17010043), 2019-01-10
Supplement: s1 [file s1]

# Synthesis and Evaluation of a Chitosan Oligosaccharide-Streptomycin Conjugate against *Pseudomonas aeruginosa* Biofilms

Ruilian Li <sup>1,2</sup>, Xianghua Yuan <sup>3</sup>, Jinhua Wei <sup>2</sup>, Xiafei Zhang <sup>3</sup>, Gong Cheng<sup>2</sup>,  
Zhuo A. Wang <sup>2,\*</sup> and Yuguang Du <sup>2,\*</sup>

<sup>1</sup> University of Chinese Academy of Sciences, Beijing 100049, China; rlli@ipe.ac.cn

<sup>2</sup> Key Laboratory of Biopharmaceutical Production & Formulation Engineering, PLA and State Key Laboratory of Biochemical Engineering, Institute of Process Engineering, Chinese Academy of Sciences, Beijing 100190, China; jhwei@ipe.ac.cn (J.W.); gcheng@ipe.ac.cn

<sup>3</sup> (G.C.) College of Life Science, Sichuan Normal University, Chengdu 610101, China; lemonlyty@sohu.com (X.Y.); feifei\_2016@126.com (X.Z.)

\* Correspondence: wangzhuo@ipe.ac.cn (Z.A.W.); ygdu@ipe.ac.cn (Y.D.);  
Tel./Fax: +86-10-8254-5070 (Z.A.W. & Y.D.)

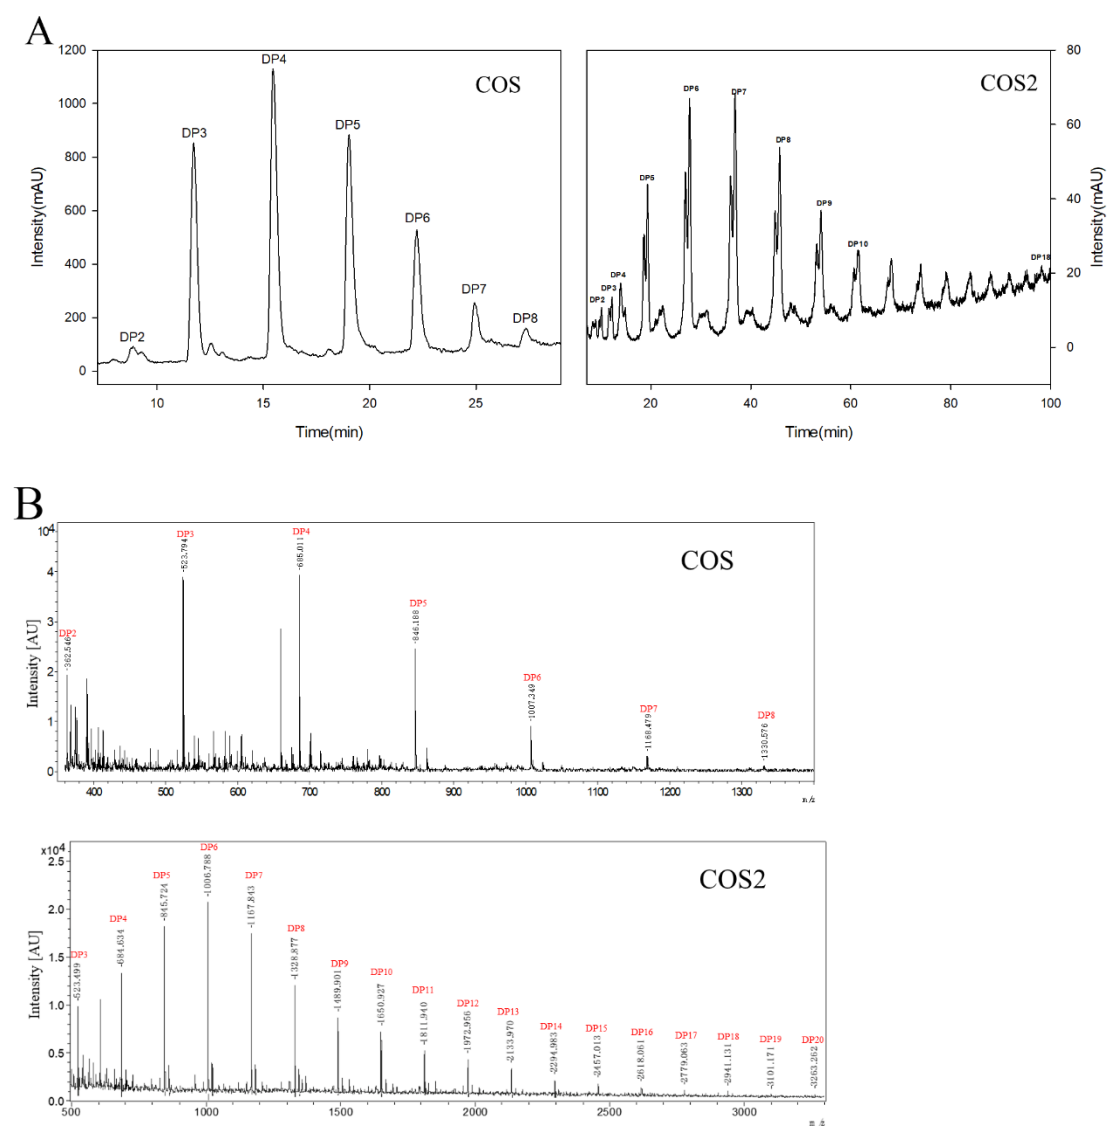

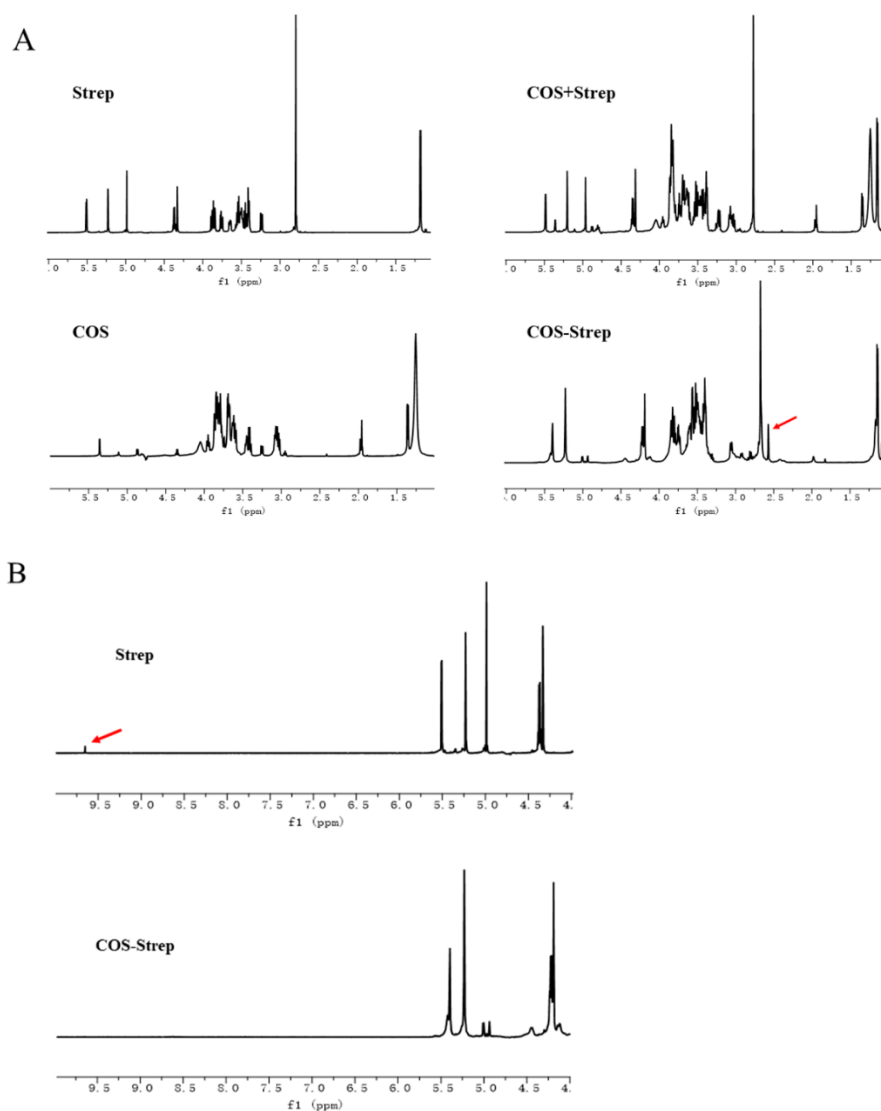

**Figure S2.  $^1\text{H}$  NMR spectra of COS, streptomycin, COS+Strep and COS-Strep conjugates.** The Freeze-dried COS, Strep, the COS-Strep conjugate and a mixture of two molecules (mass ratio 1:1) were dissolved in deuterated water to a final concentration of 30mg/mL respectively. The spectra were recorded at 298 K in deuterium oxide on a Varian VNMRS-500 NMR spectrometer. Red arrow represented the methyl protons singal at 2.57 ppm in COS-Strep conjugates (A). Red arrow represented aldehyde proton singal at 9.66 ppm that was the functional group of streptomycin (B).
